# Supplementary material for: Effects of the number and position of the substituents on the in vitro photodynamic activities of glucosylated zinc(ii) phthalocyanines
Source: Royal Society of Chemistry journal article supplement (doi:10.1039/b822128f), 2009-01-01

**Electronic Supplementary Information**

**Effects of the number and position of the substituents on the *in vitro*  
photodynamic activities of glucosylated zinc(II) phthalocyanines**

**Jian-Yong Liu, Pui-Chi Lo, Wing-Ping Fong and Dennis K. P. Ng\***

(a)

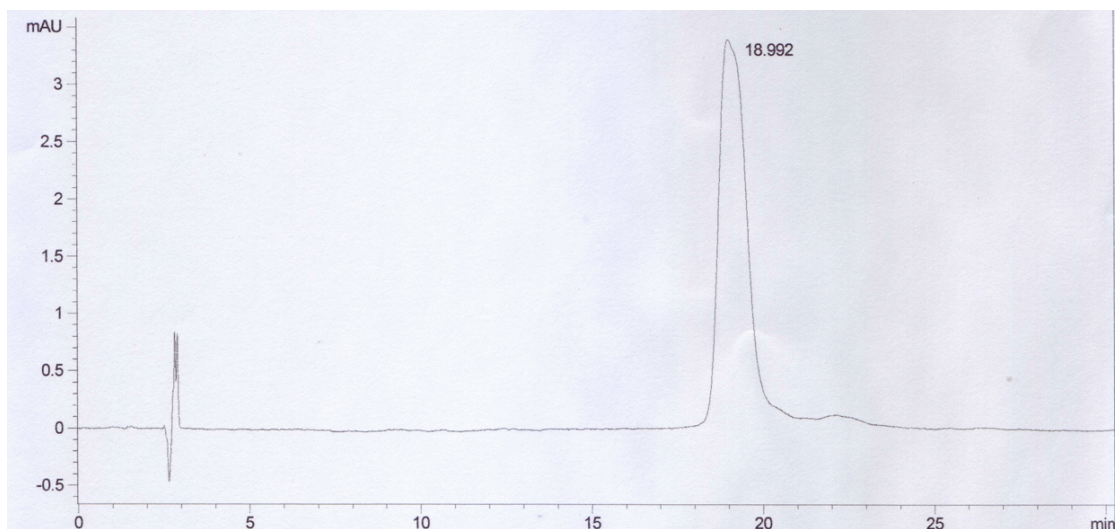

(b)

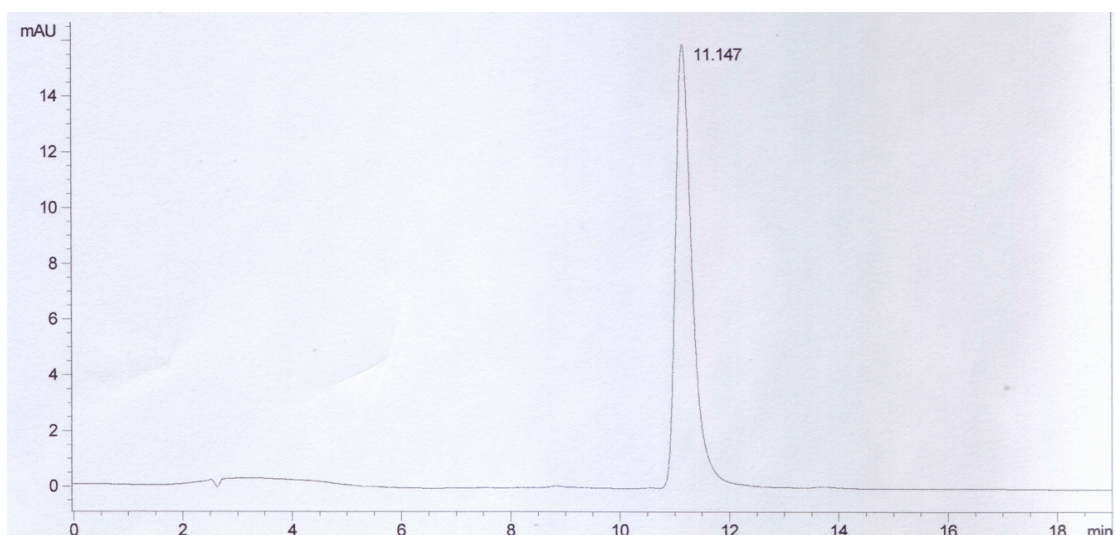

**Fig. S1** HPLC analysis of the purified (a)  $\text{ZnPc}(\beta\text{-Glu})_4$  (**5**) and (b)  $\text{ZnPc}(\alpha\text{-Glu})_2$  (**12**). The mobile phase was  $\text{CH}_3\text{OH}/\text{H}_2\text{O}$  (4:1 v/v) and  $\text{CH}_3\text{OH}/\text{H}_2\text{O}$  (2:3 v/v) respectively. The relatively broad signal for  $\text{ZnPc}(\beta\text{-Glu})_4$  (**5**) can be attributed to the fact that it exists as a mixture of structural isomers.

In all of the following spectra, residual solvent signals are marked with asterisks.

$^1\text{H}$  NMR and  $^{13}\text{C}\{^1\text{H}\}$  NMR spectra of compound **3** in  $\text{CDCl}_3$

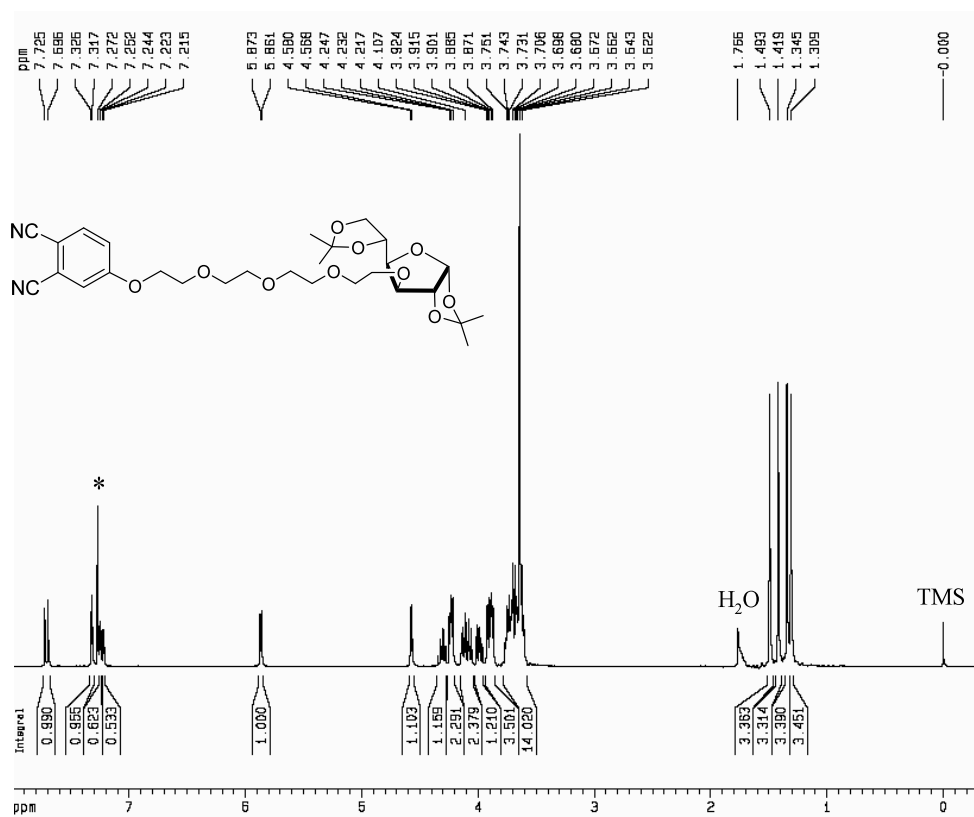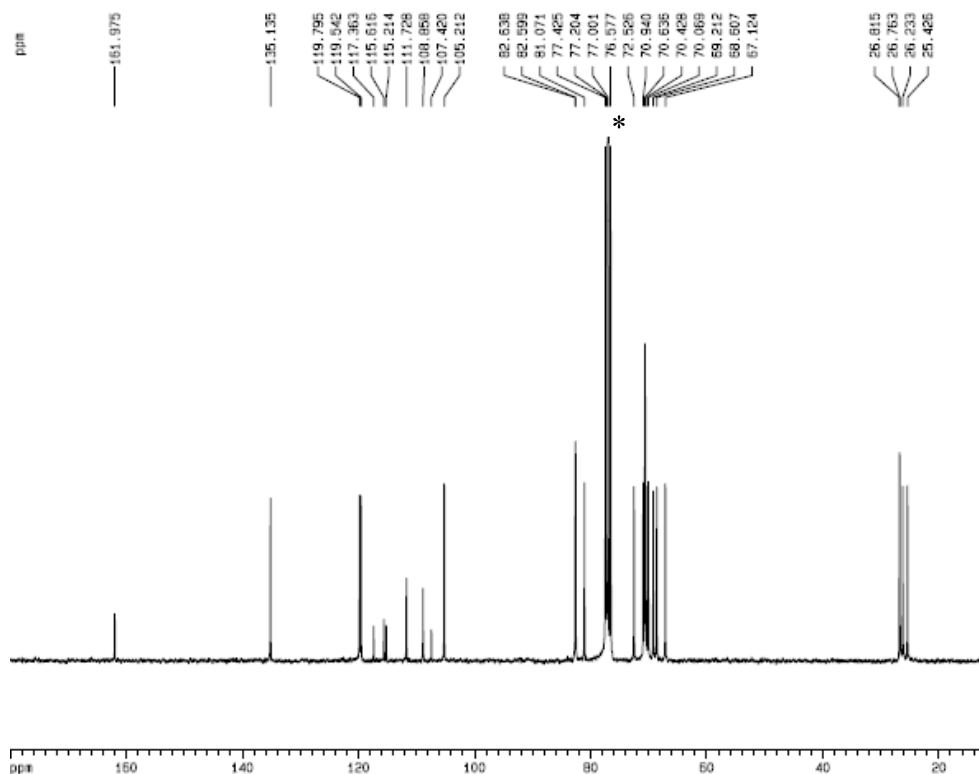

$^1\text{H}$  NMR and  $^1\text{H}$ - $^1\text{H}$  COSY spectra of compound **4** in  $\text{CDCl}_3$  with a trace amount of pyridine- $d_5$

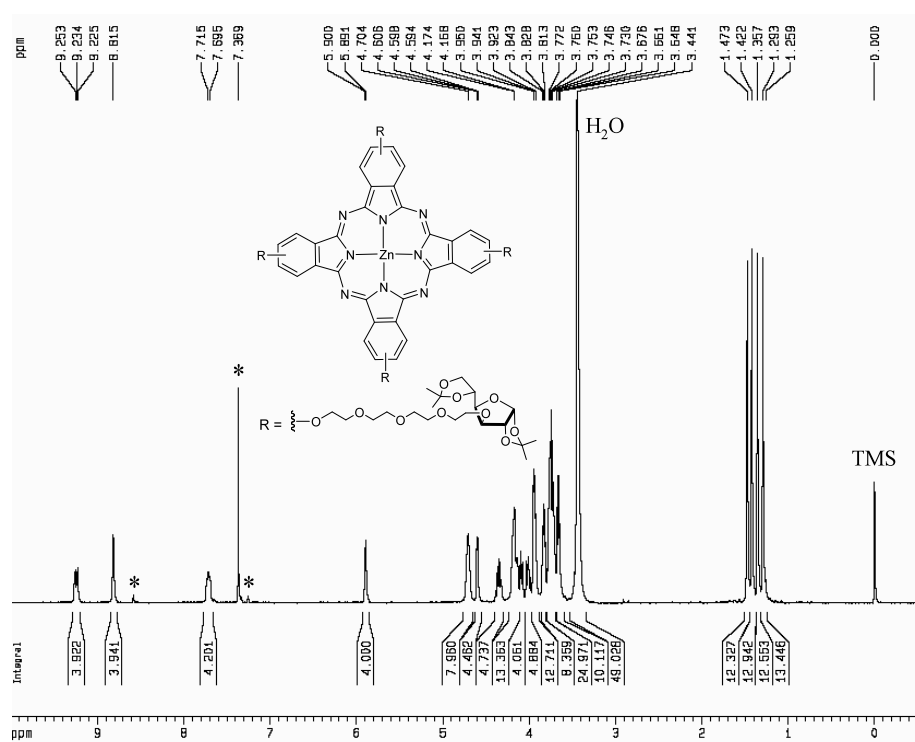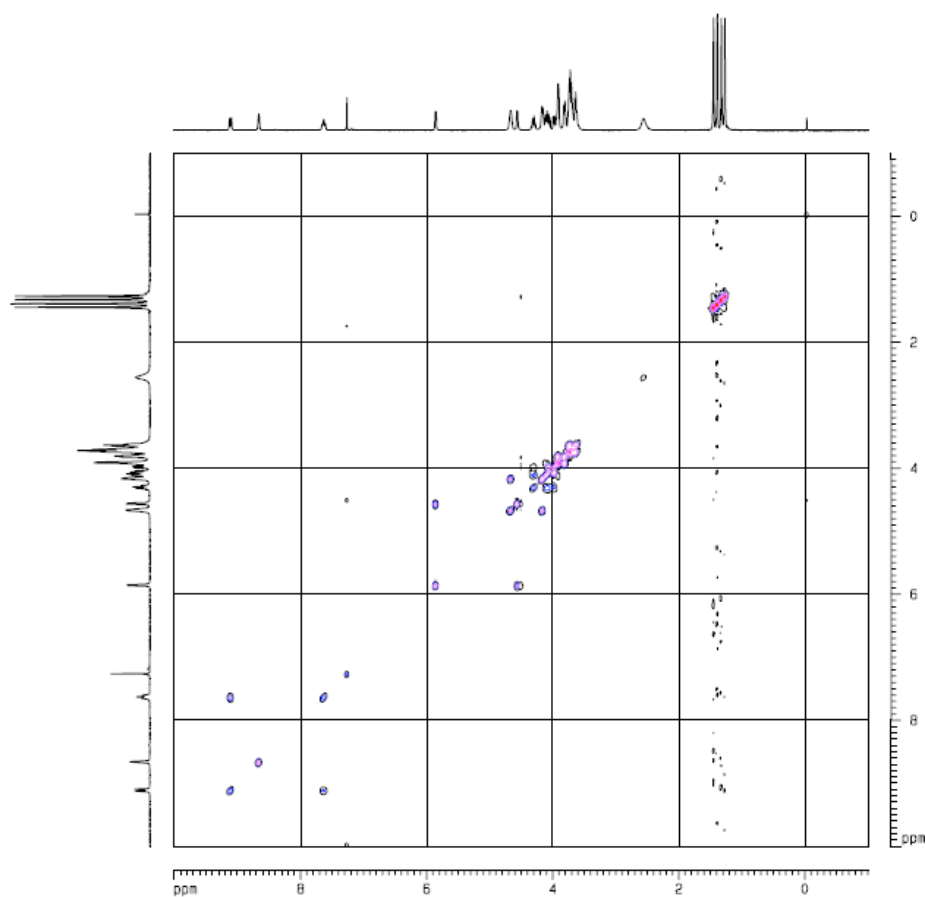

$^1\text{H}$  NMR spectrum of compound **5** in  $\text{CDCl}_3$  with a trace amount of pyridine- $\text{d}_5$

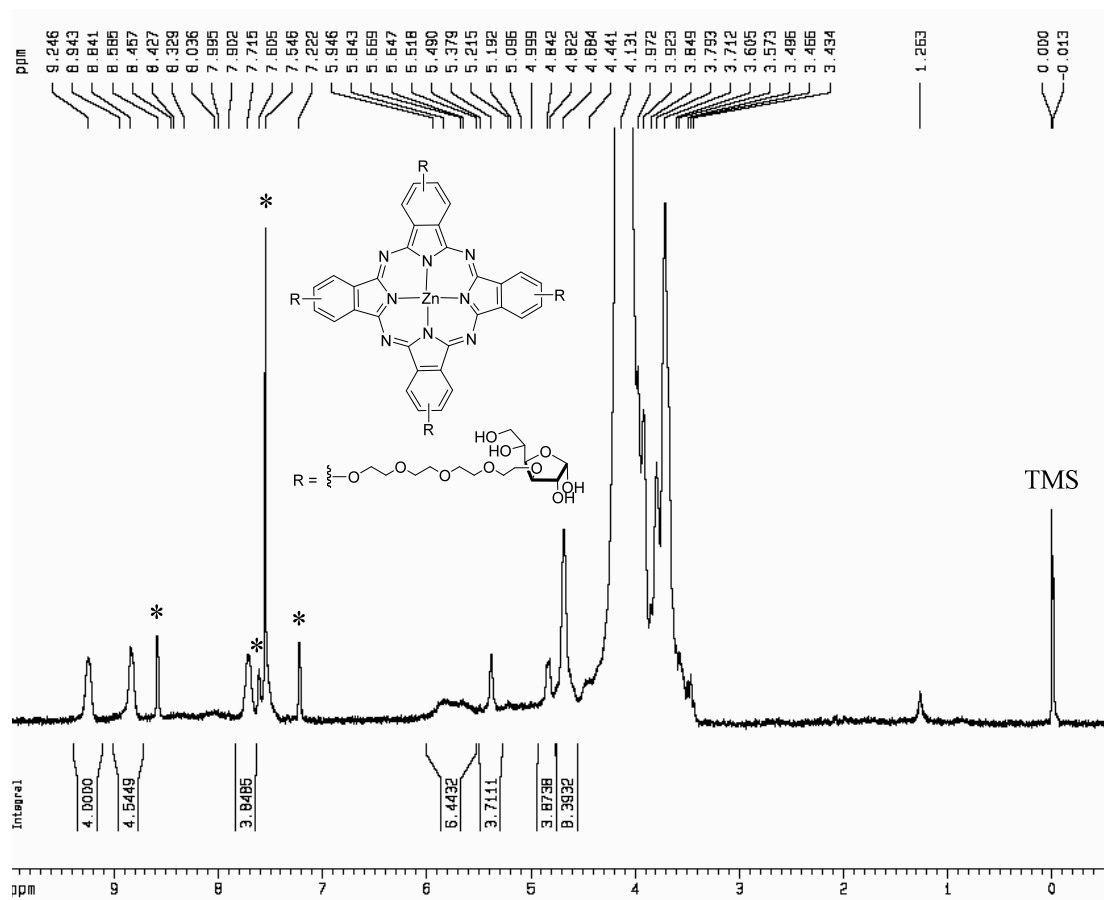

$^1\text{H}$  NMR and  $^{13}\text{C}\{^1\text{H}\}$  NMR spectra of compound **7** in  $\text{CDCl}_3$  with a trace amount of pyridine- $d_5$

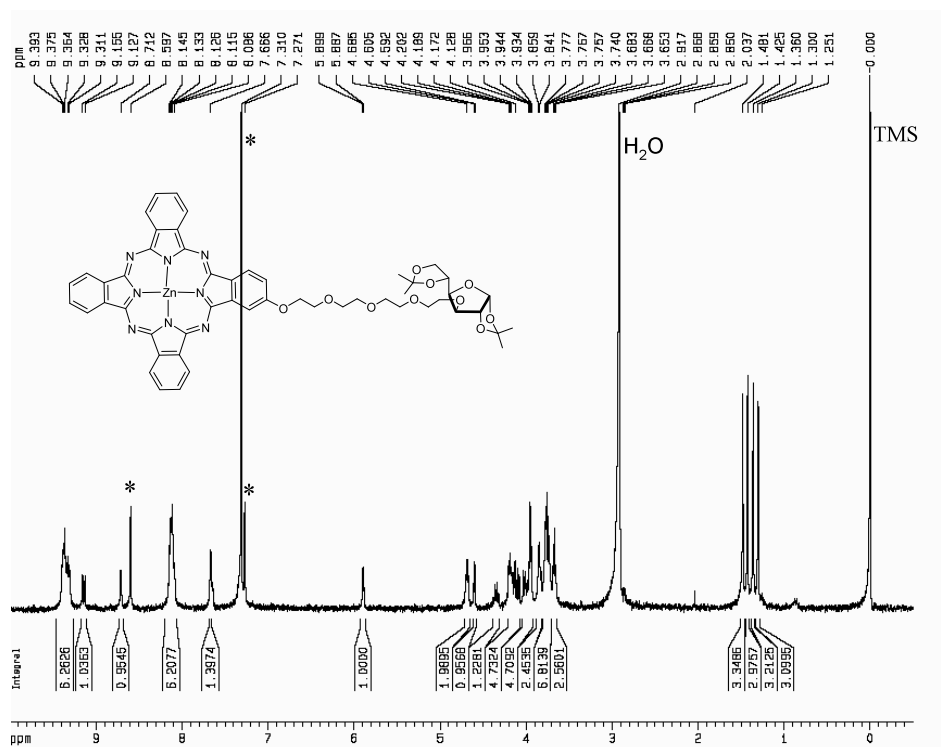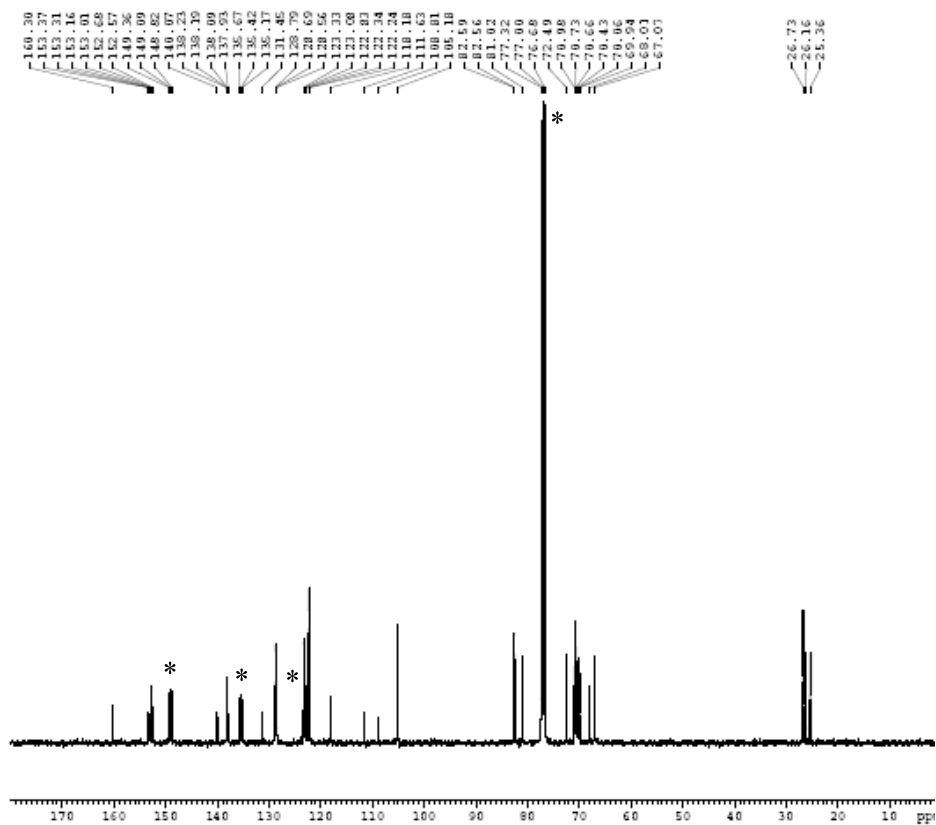



$^1\text{H}$  NMR and  $^{13}\text{C}\{^1\text{H}\}$  NMR spectra of compound **8** in  $\text{CDCl}_3$

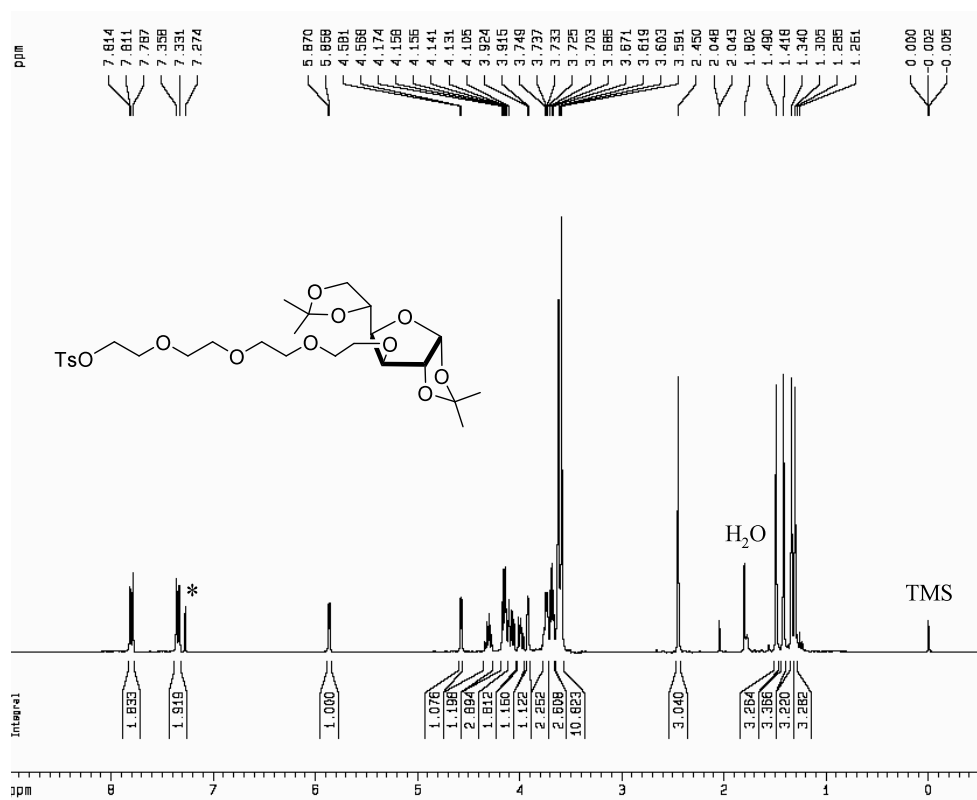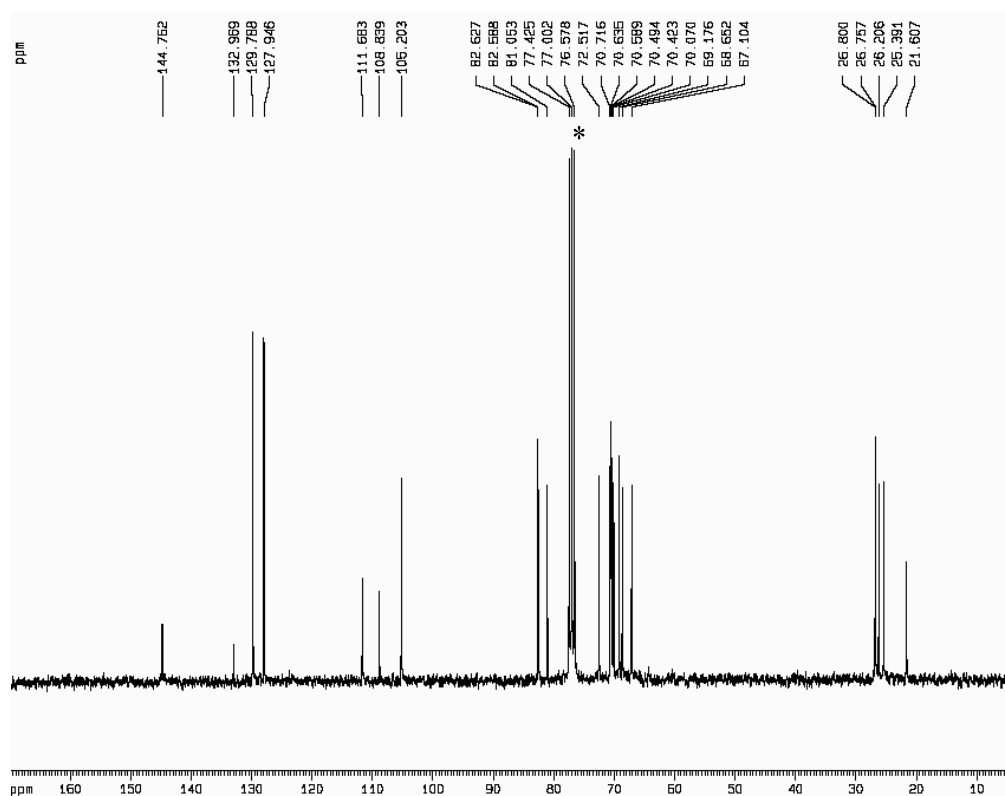



$^1\text{H}$  NMR and  $^{13}\text{C}\{^1\text{H}\}$  NMR spectra of compound **10** in  $\text{CDCl}_3$

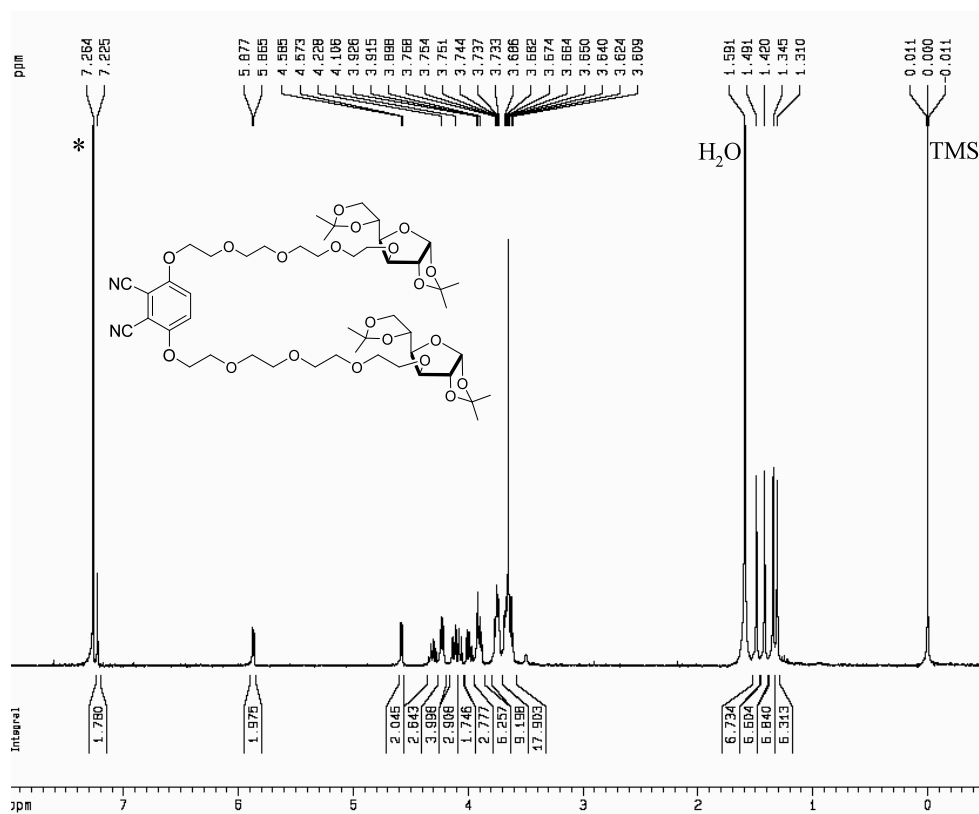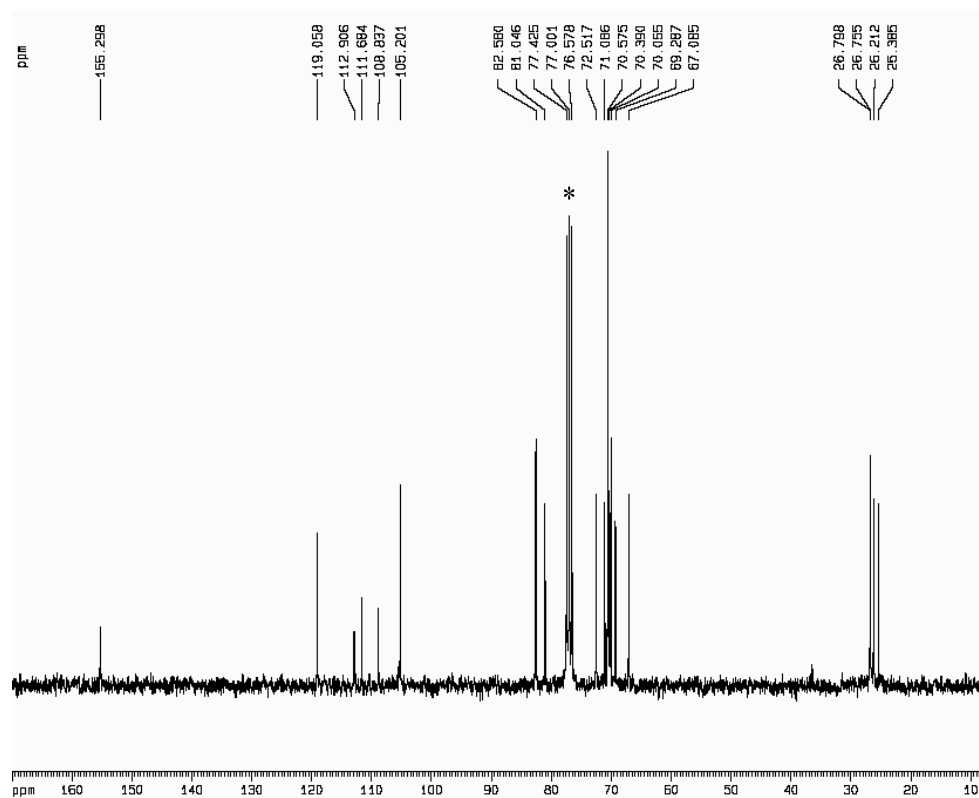

$^1\text{H}$  NMR and  $^{13}\text{C}\{^1\text{H}\}$  NMR spectra of compound **11** in  $\text{CDCl}_3$  with a trace amount of pyridine- $d_5$

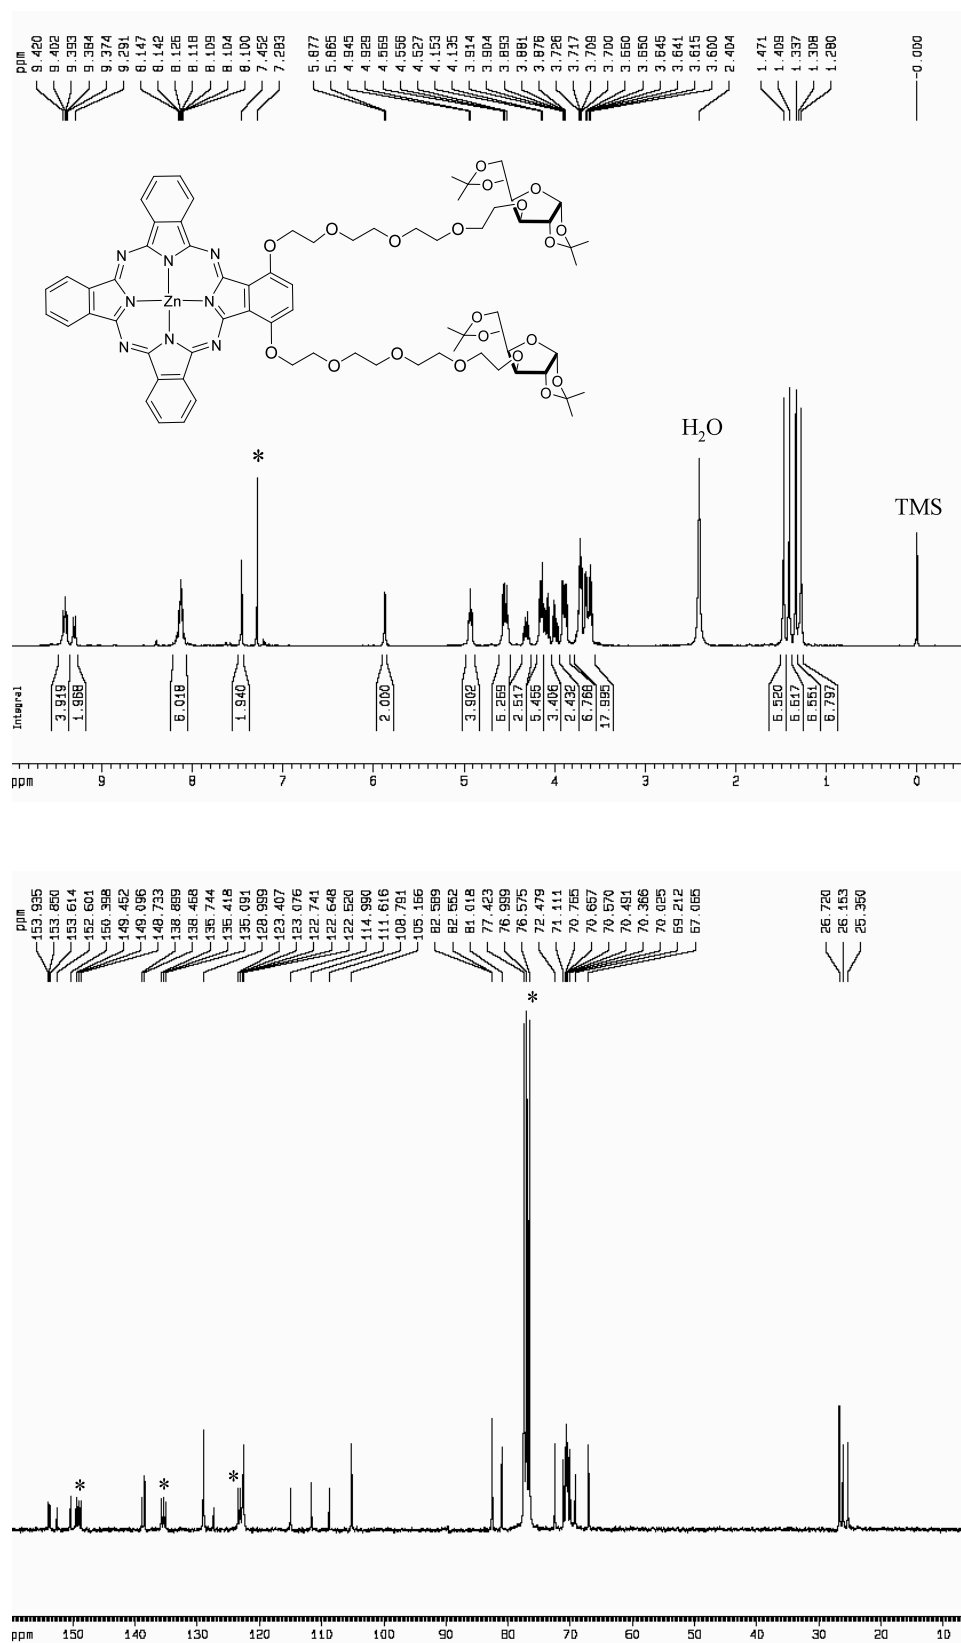

$^1\text{H}$ - $^1\text{H}$  COSY spectrum of **11** in  $\text{CDCl}_3$  with a trace amount of pyridine- $\text{d}_5$

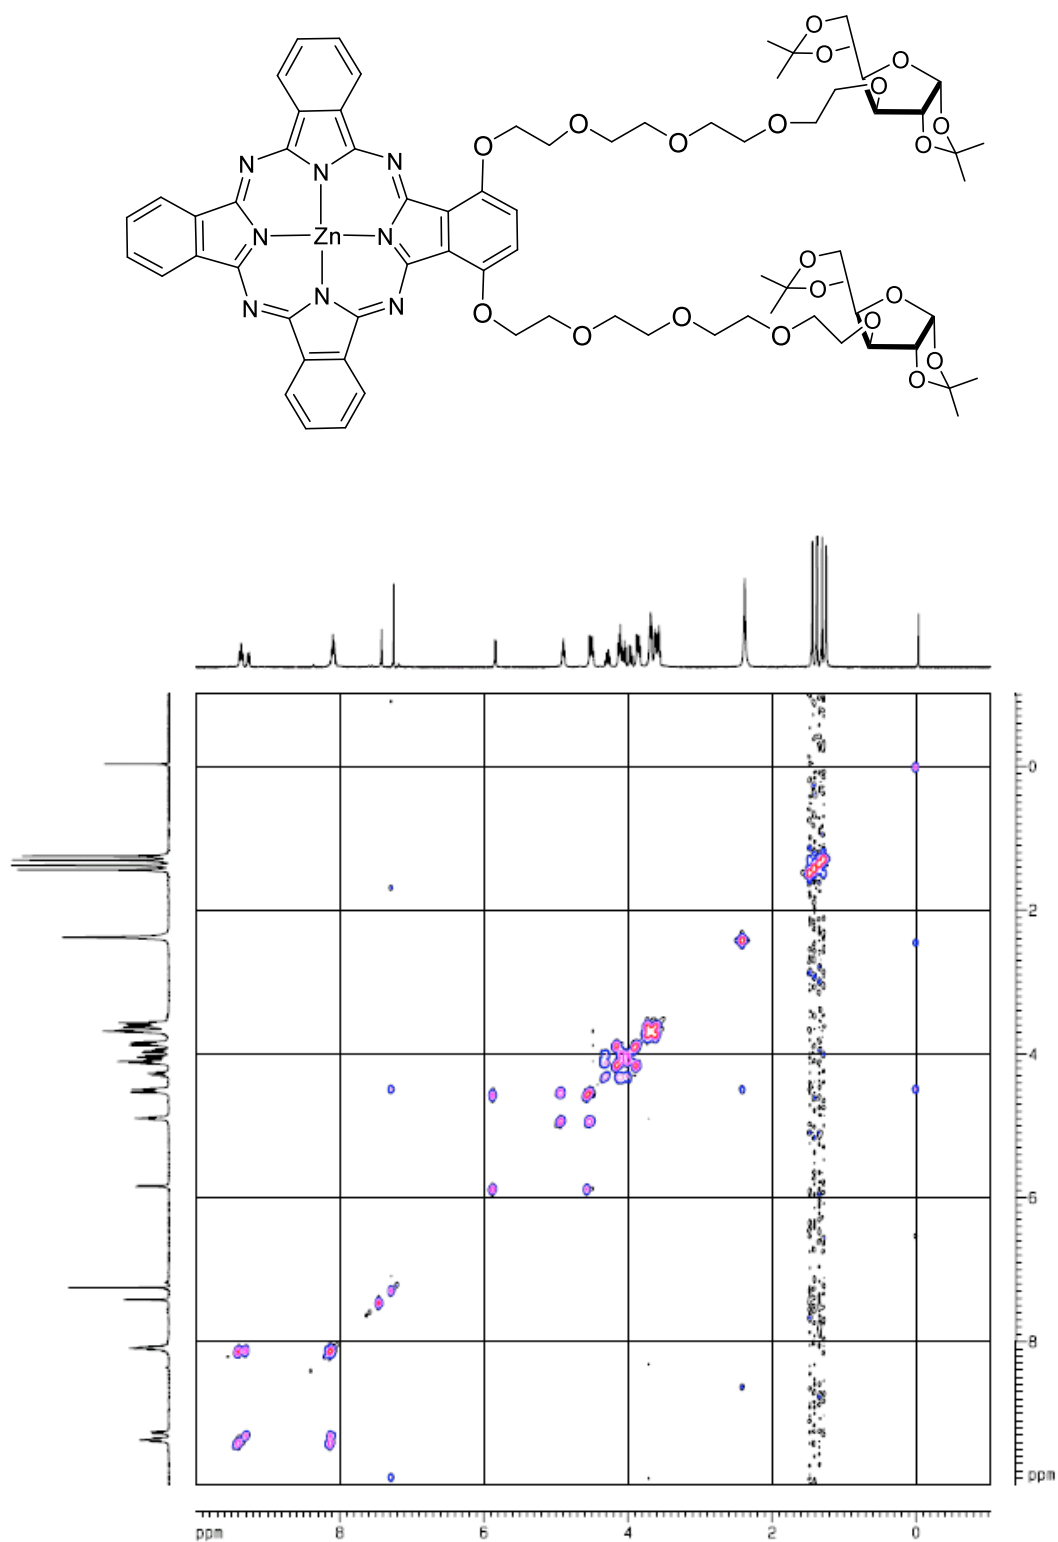

$^1\text{H}$  NMR spectrum of compound **12** in  $\text{CDCl}_3$  with a trace amount of pyridine- $d_5$

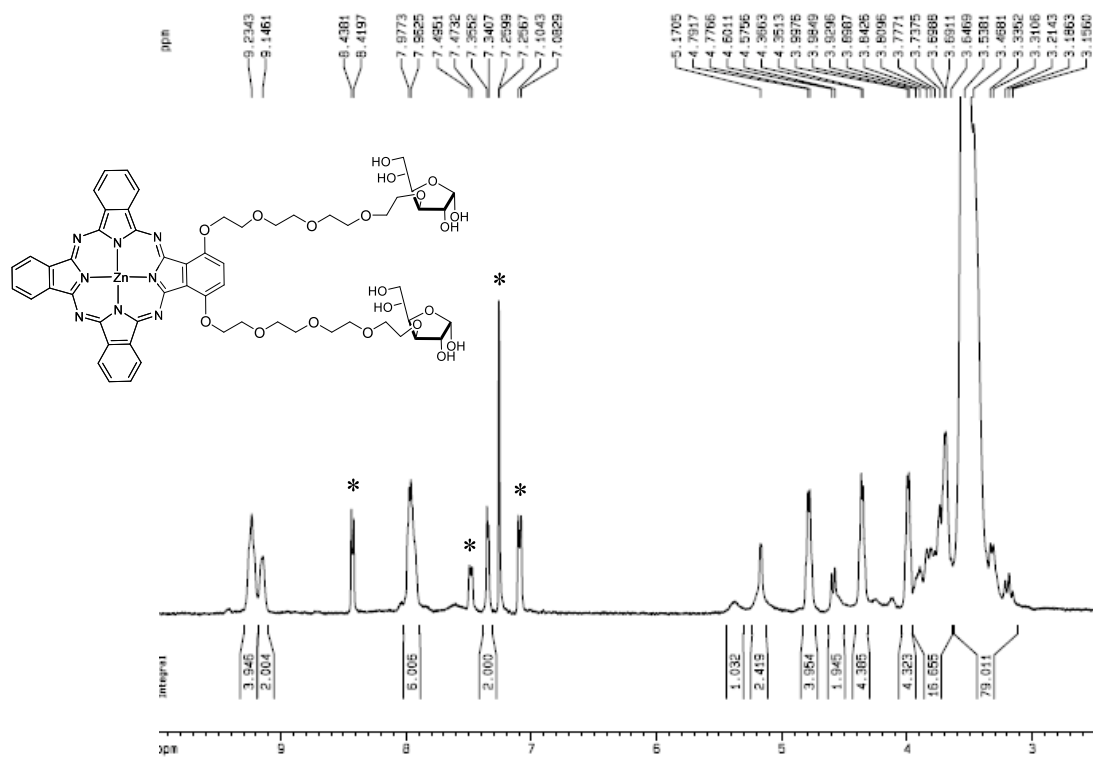

$^1\text{H}$  NMR and  $^{13}\text{C}\{^1\text{H}\}$  NMR spectra of compound **15** in  $\text{CDCl}_3$

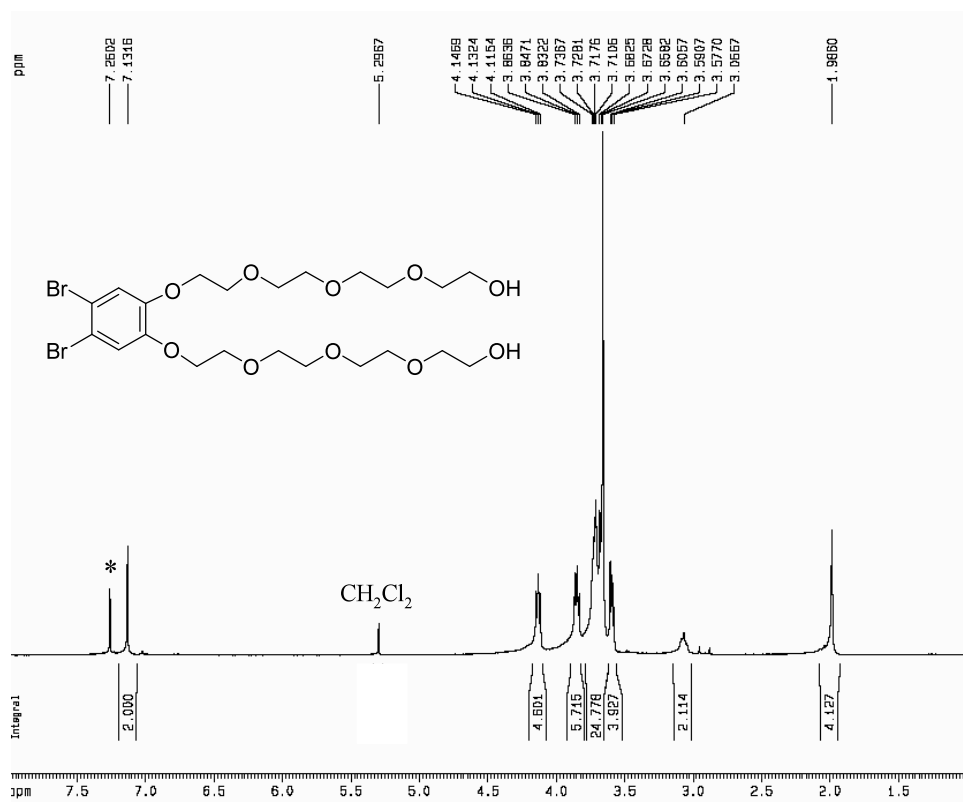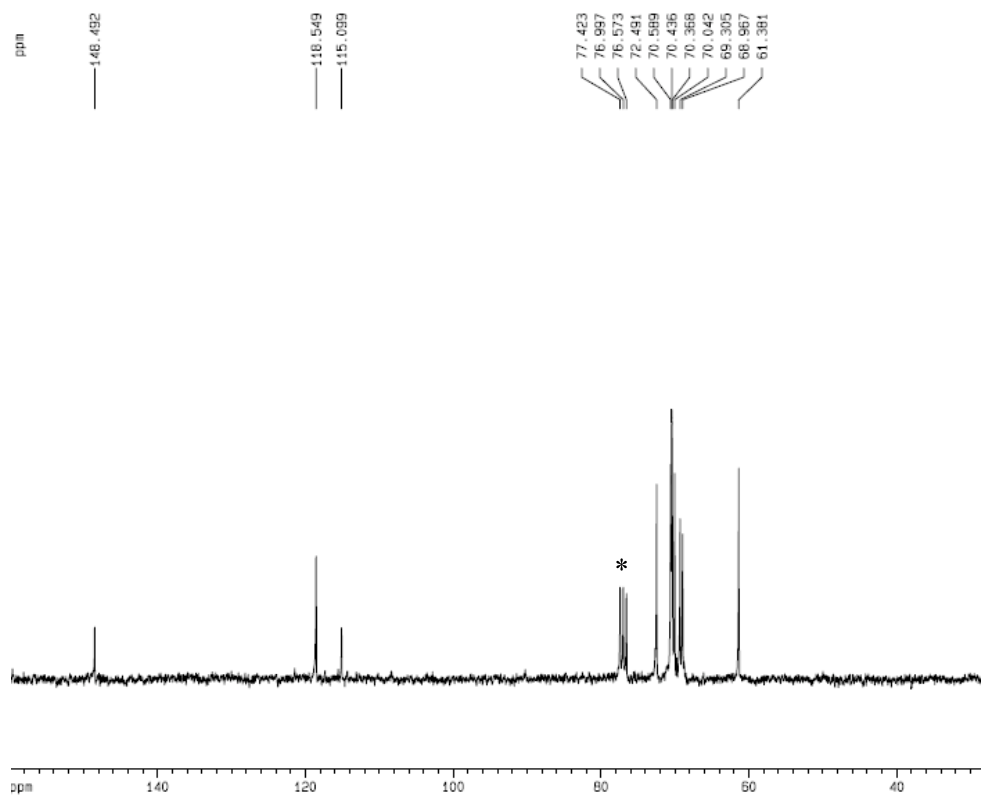



$^1\text{H}$  NMR and  $^{13}\text{C}\{^1\text{H}\}$  NMR spectra of compound **18** in  $\text{CDCl}_3$

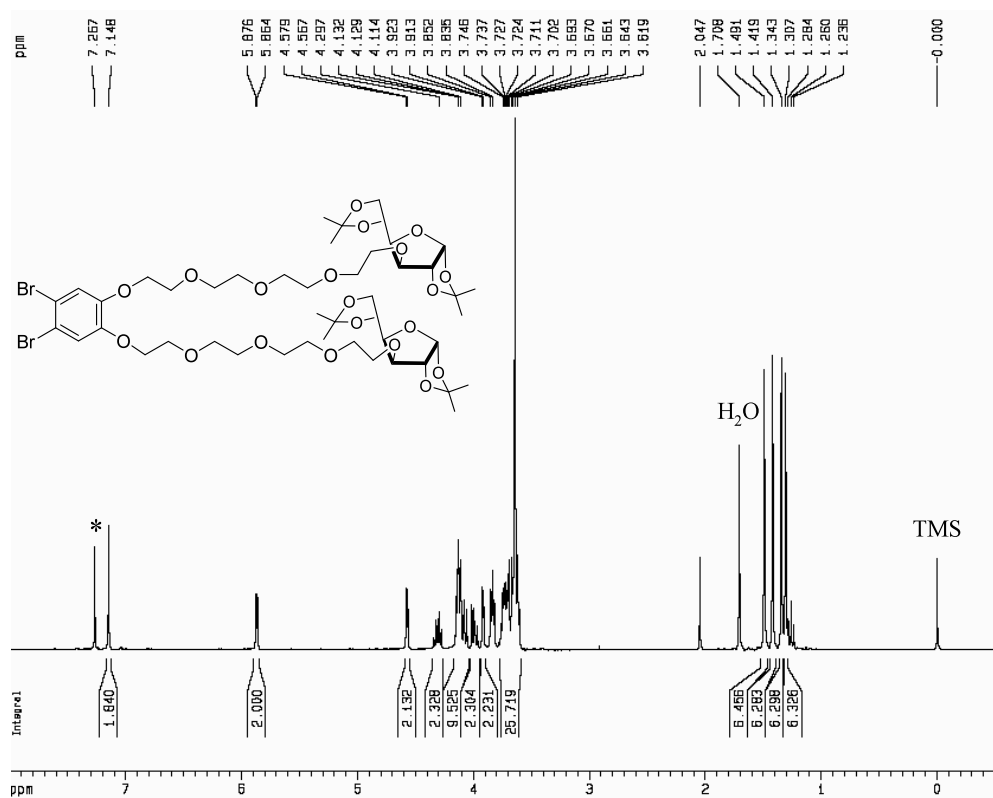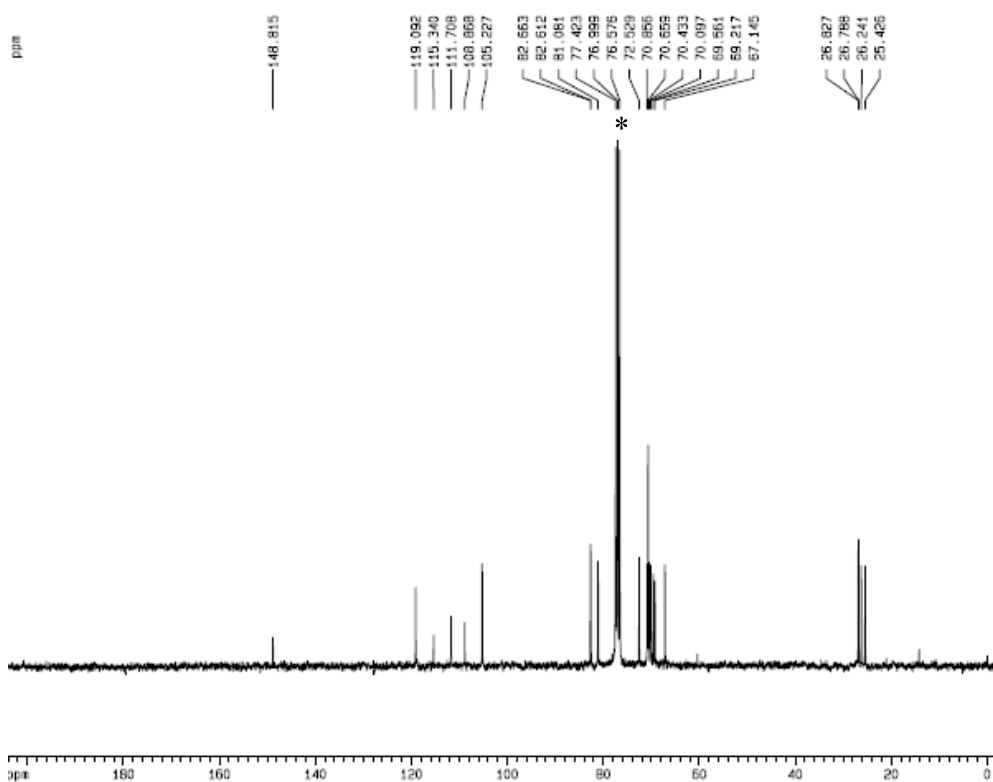

$^1\text{H}$  NMR and  $^{13}\text{C}\{^1\text{H}\}$  NMR spectra of compound **19** in  $\text{CDCl}_3$

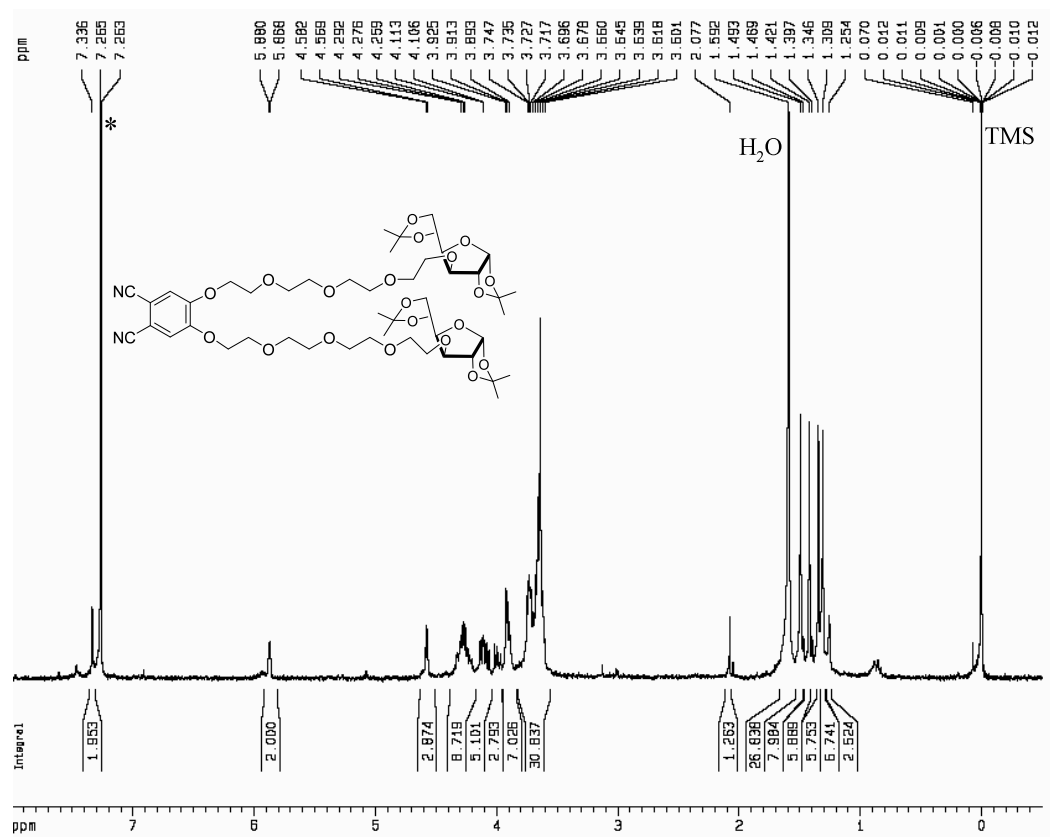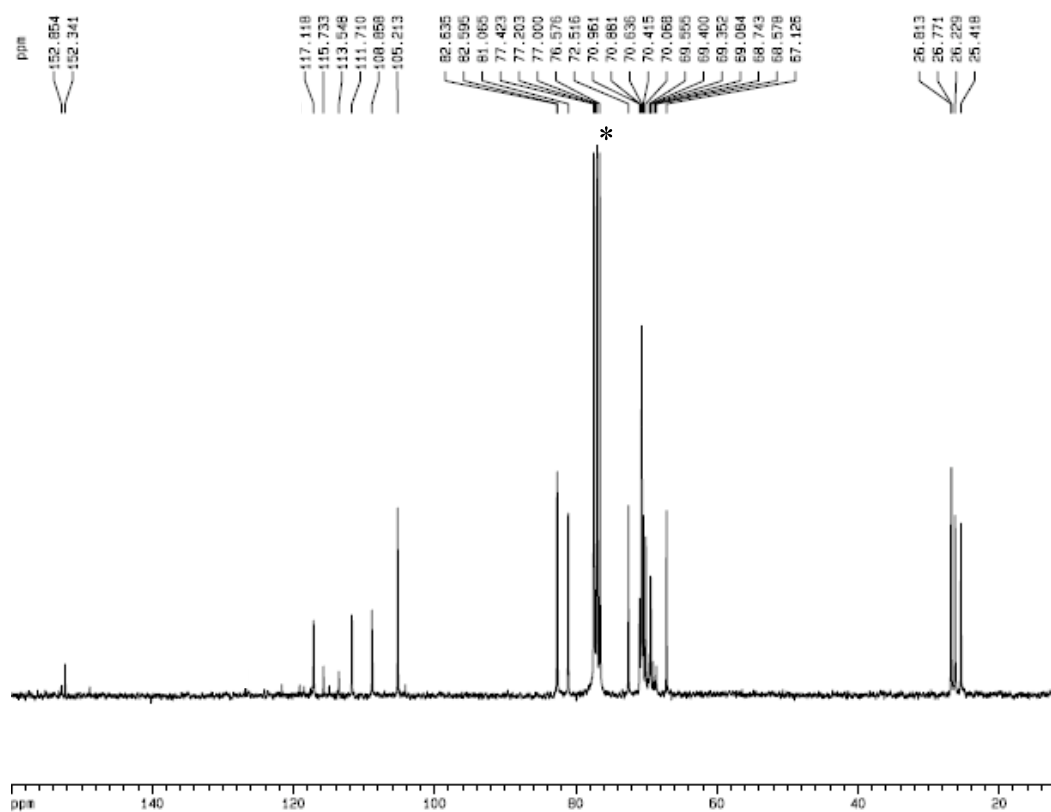



$^1\text{H}$  NMR and  $^{13}\text{C}\{^1\text{H}\}$  NMR spectra of compound **20** in  $\text{CDCl}_3$  with a trace amount of pyridine- $\text{d}_5$

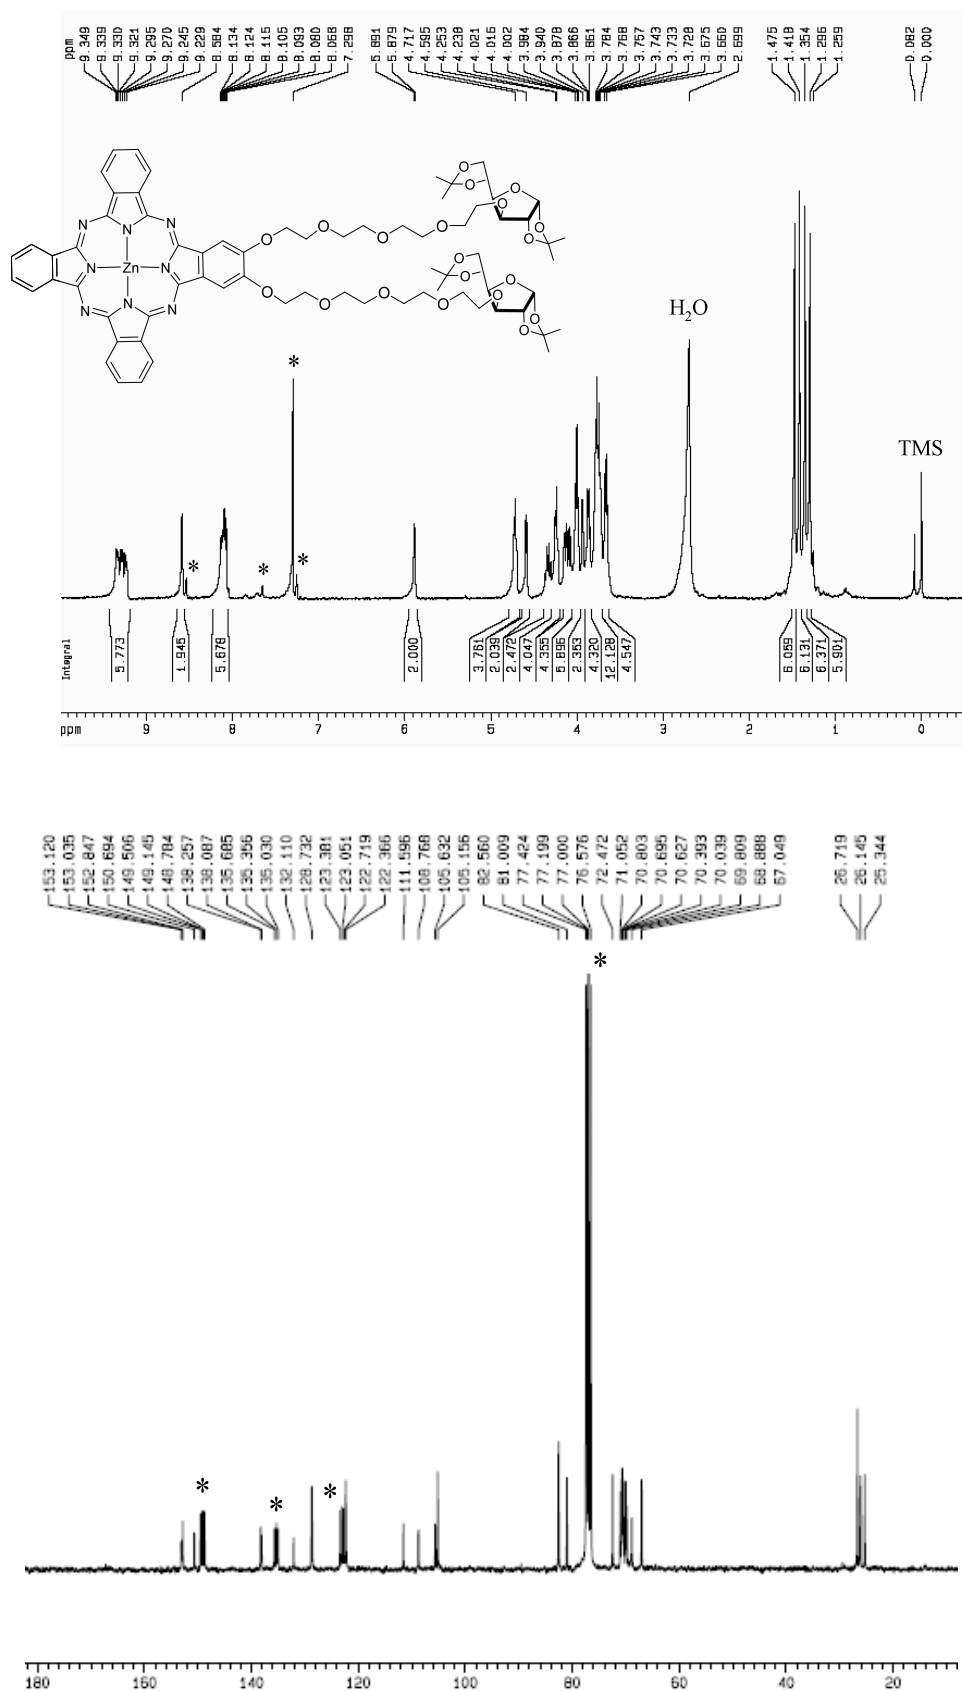

$^1\text{H}$ - $^1\text{H}$  COSY spectrum of **20** in  $\text{CDCl}_3$  with a trace amount of pyridine- $\text{d}_5$

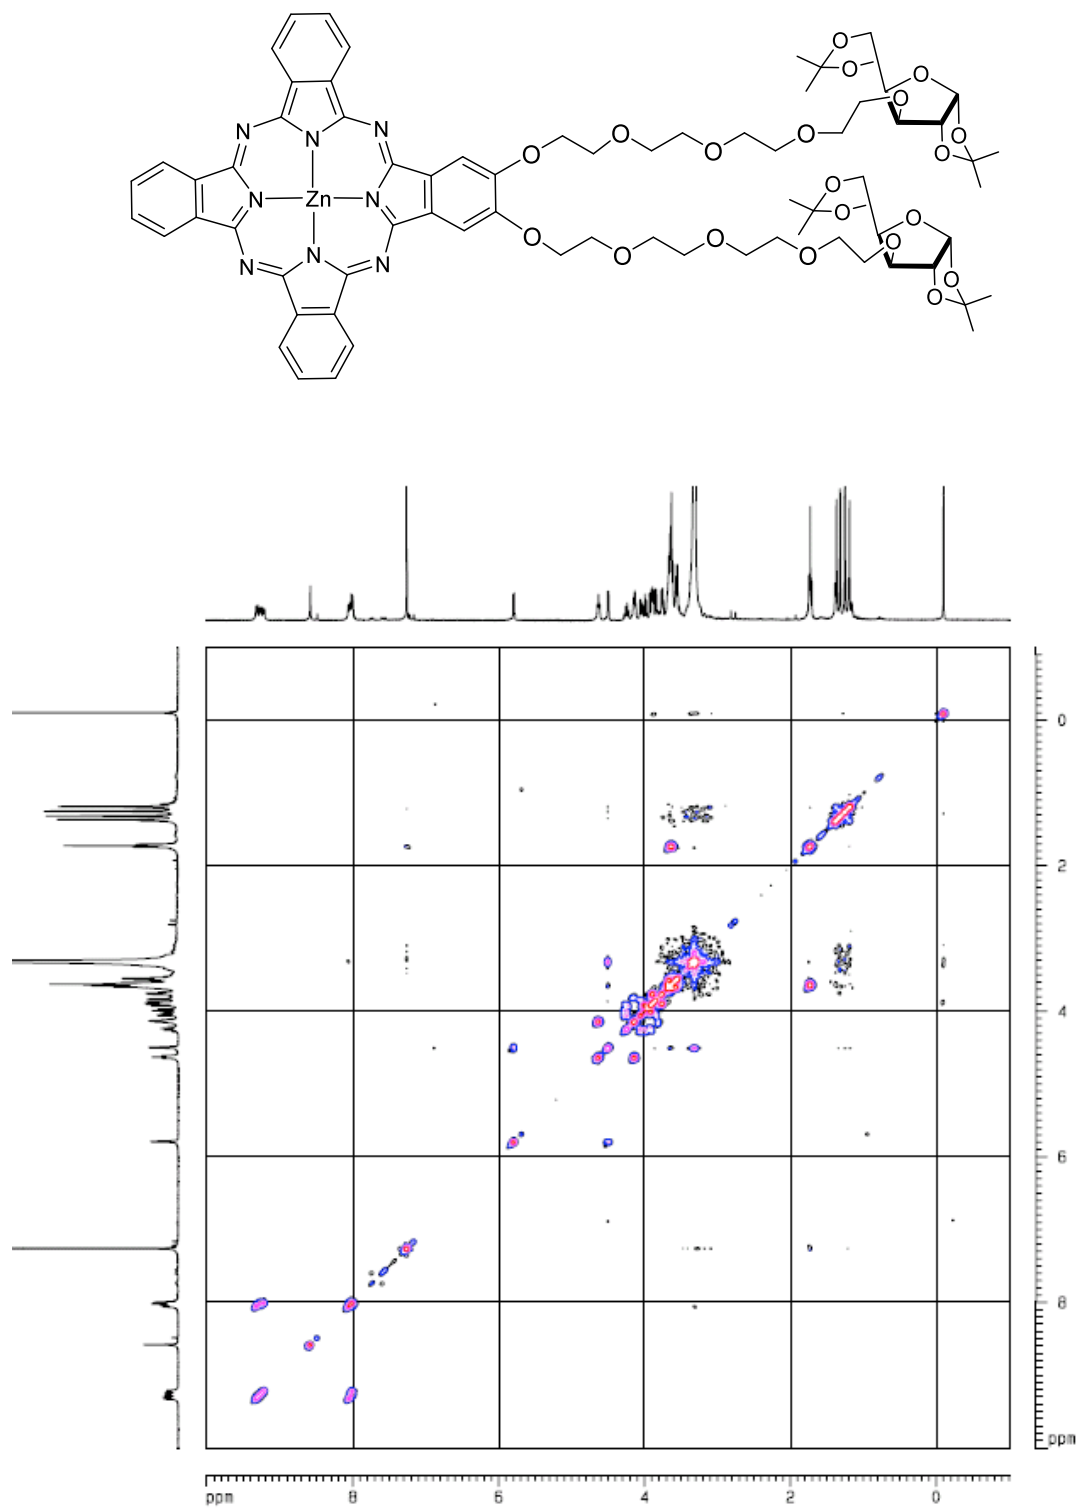

Supplement: b822128f.pdf [file b822128f.pdf]
